# Supplementary material for: Asymptomatic monkeypox virus infections among male sexual health clinic attendees in Belgium
Source: medRxiv preprint, doi:10.1101/2022.07.04.22277226, version 1 (2022-07-05)
Supplement: supplementary figure 1 [file 277226_file03.docx]

**Supplementary material**

**Asymptomatic monkeypox virus infections among male sexual health clinic attendees in Belgium**


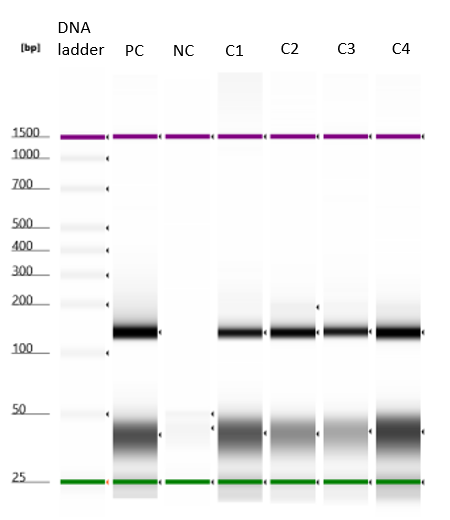


Supplementary Figure 1: PCR template sizes using Tapestation 4150 (Agilent). PC: Positive control; NC: Negative control; C: case
